# Supplementary material for: Groundwater Quality, Health Risk Assessment, and Source Distribution of Heavy Metals Contamination around Chromite Mines: Application of GIS, Sustainable Groundwater Management, Geostatistics, PCAMLR, and PMF Receptor Model
Source: MDPI journal article supplement (doi:10.3390/ijerph20032113), 2023-01-24
Supplement: s1 [file s1]

Supporting Information's

# Groundwater Quality, Health Risk Assessment, and Source Distribution of Heavy Metals Contamination around Chromite Mines: Application of GIS, Sustainable Groundwater Management, Geostatistics, PCAMLR, and PMF Receptor Model

Abdur Rashid <sup>1,5,\*</sup>, Muhammad Ayub <sup>2</sup>, Zahid Ullah <sup>1</sup>, Asmat Ali <sup>1</sup>, Tariq Sardar <sup>3</sup>, Javed Iqbal <sup>4</sup>, Xubo Gao <sup>1,\*</sup>, Jochen Bundschuh <sup>4</sup>, Chengcheng Li <sup>1</sup>, Seema Anjum Khattak <sup>5</sup>, Liaqat Ali <sup>5</sup>, Hamed A. El-Serehy <sup>6</sup>, Prashant Kaushik <sup>7</sup> and Sardar Khan <sup>8</sup>

<sup>1</sup> State Key Laboratory of Biogeology and Environmental Geology, School of Environmental Studies,

China University of Geosciences, Wuhan, 430074, P.R. China

<sup>2</sup> Department of Botany Hazara University PO 21300 Pakistan

<sup>3</sup> Department of Environmental Sciences, Kohat University of Science and Technology, Pakistan

<sup>4</sup> School of Civil Engineering and Surveying, Faculty of Health, Engineering and Sciences, University of Southern Queensland, West Street, Toowoomba, 4350, Queensland, Australia

<sup>5</sup> National Centre of Excellence in Geology, University of Peshawar, 25130, Pakistan

<sup>6</sup> Department of Zoology, College of Science, King Saud University, Riyadh 11451, Saudi Arabia

<sup>7</sup> Instituto de Conservación y Mejora de la Agrodiversidad Valenciana, Universitat Politècnica de València, 46022 Valencia, Spain

<sup>8</sup> Department of Environmental Sciences, University of Peshawar, PO 25120, Pakistan

\* Correspondence: abdur.rashid@bs.qau.edu.pk (A.R.), Xubogao@qq.com (X.G.)

**Table S1.** Compile principal component analysis (PCA) results of groundwater (n=55), in mining, non-mining region, and chromite mines water collected from Malakand, Northern Pakistan.

| Parameters       | Groundwater (n=55) |              |               |               |               | Chromite mines water (n=5) |               |               |
|------------------|--------------------|--------------|---------------|---------------|---------------|----------------------------|---------------|---------------|
|                  | F1                 | F2           | F3            | F4            | F5            | F1                         | F2            | F3            |
| Factors          |                    |              |               |               |               |                            |               |               |
| pH               | <b>0.949</b>       | 0.103        | -0.097        | -0.148        | 0.093         | <b>0.531</b>               | <b>-0.728</b> | 0.421         |
| Depth            | 0.011              | -0.285       | -0.302        | <b>0.650</b>  | -0.059        | <b>-0.700</b>              | 0.097         | <b>0.673</b>  |
| Elevation        | -0.149             | 0.070        | <b>-0.498</b> | 0.287         | 0.420         | <b>0.551</b>               | 0.463         | -0.003        |
| EC               | <b>0.604</b>       | <b>0.849</b> | -0.101        | 0.052         | <b>-0.561</b> | <b>0.682</b>               | -0.188        | <b>0.707</b>  |
| Temperature      | -0.335             | -0.197       | <b>-0.521</b> | <b>-0.600</b> | -0.025        | <b>0.874</b>               | 0.402         | -0.236        |
| TDS              | <b>0.559</b>       | <b>0.853</b> | -0.134        | 0.169         | <b>-0.512</b> | 0.356                      | -0.220        | <b>0.903</b>  |
| Turbidity        | -0.200             | 0.256        | -0.318        | 0.055         | <b>0.673</b>  | <b>-0.934</b>              | 0.060         | -0.311        |
| Na               | <b>0.985</b>       | 0.024        | 0.015         | 0.043         | 0.072         | -0.029                     | <b>0.917</b>  | 0.396         |
| K                | <b>0.686</b>       | -0.187       | 0.195         | -0.355        | 0.230         | <b>0.966</b>               | -0.049        | 0.255         |
| Mg               | <b>-0.858</b>      | -0.244       | 0.171         | -0.055        | 0.054         | -0.145                     | <b>-0.758</b> | <b>-0.633</b> |
| Ca               | <b>-0.909</b>      | 0.141        | 0.206         | 0.121         | -0.004        | 0.324                      | <b>-0.653</b> | -0.447        |
| PO <sub>4</sub>  | -0.020             | 0.030        | -0.026        | <b>-0.620</b> | -0.286        | <b>0.819</b>               | -0.167        | -0.116        |
| NO <sub>3</sub>  | 0.206              | -0.107       | <b>-0.680</b> | 0.232         | 0.000         | <b>-0.503</b>              | <b>-0.805</b> | 0.252         |
| HCO <sub>3</sub> | <b>0.900</b>       | 0.197        | 0.110         | -0.058        | 0.237         | <b>-0.520</b>              | <b>0.639</b>  | <b>-0.566</b> |
| Cl               | 0.065              | 0.038        | <b>0.749</b>  | 0.254         | 0.034         | 0.312                      | <b>0.728</b>  | <b>0.553</b>  |
| SO <sub>4</sub>  | <b>0.501</b>       | -0.215       | <b>0.762</b>  | 0.322         | 0.214         | 0.104                      | <b>0.567</b>  | -0.403        |
| ORP              | -0.140             | <b>0.659</b> | -0.105        | -0.071        | <b>0.622</b>  | <b>0.939</b>               | -0.016        | -0.244        |
| Cr               | <b>0.543</b>       | -0.275       | -0.375        | <b>0.514</b>  | -0.074        | <b>0.973</b>               | -0.186        | 0.134         |
| Ni               | <b>-0.534</b>      | 0.350        | 0.197         | -0.308        | <b>0.536</b>  | <b>-0.514</b>              | <b>-0.769</b> | 0.038         |
| Mn               | <b>0.527</b>       | <b>0.594</b> | 0.211         | 0.275         | -0.005        | <b>0.965</b>               | 0.259         | -0.045        |
| Eigenvalue       | 5.288              | 2.848        | 2.713         | 2.062         | 1.752         | 8.437                      | 5.845         | 3.867         |
| Variability (%)  | 26.439             | 14.239       | 13.563        | 10.311        | 8.759         | 42.184                     | 29.224        | 19.333        |
| Cumulative %     | 26.439             | 40.678       | 54.240        | 64.551        | 73.310        | 42.184                     | 71.408        | 90.741        |

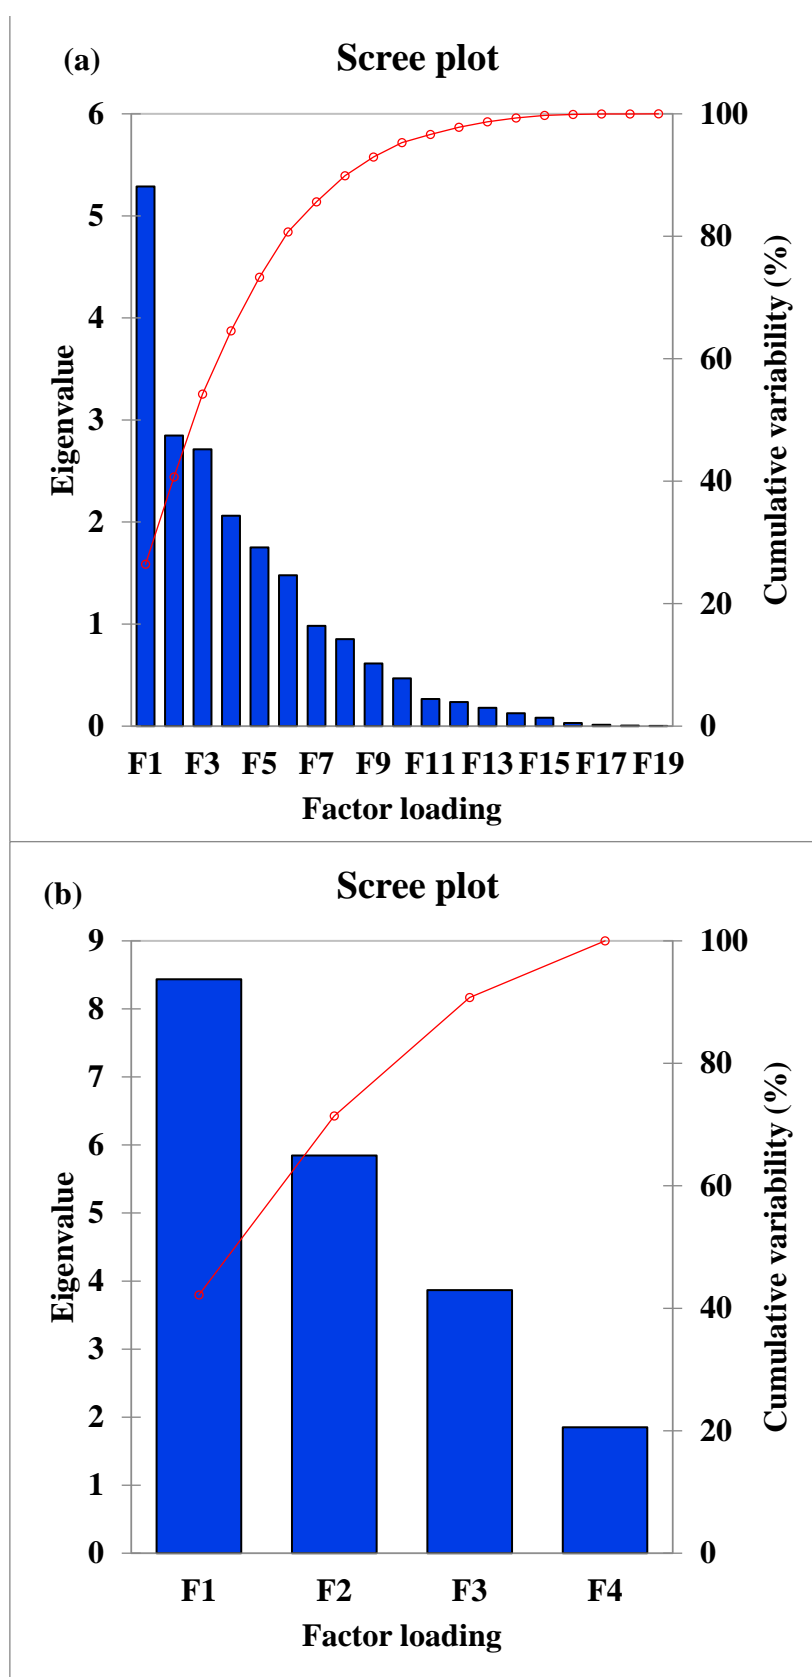

**Figure S1.** (a) Overall loading factors of PCA in groundwater of mining, and non-mining region, and (b) loading factors of PCA in chromite mines water in ultramafic terrain of Malakand, Pakistan.

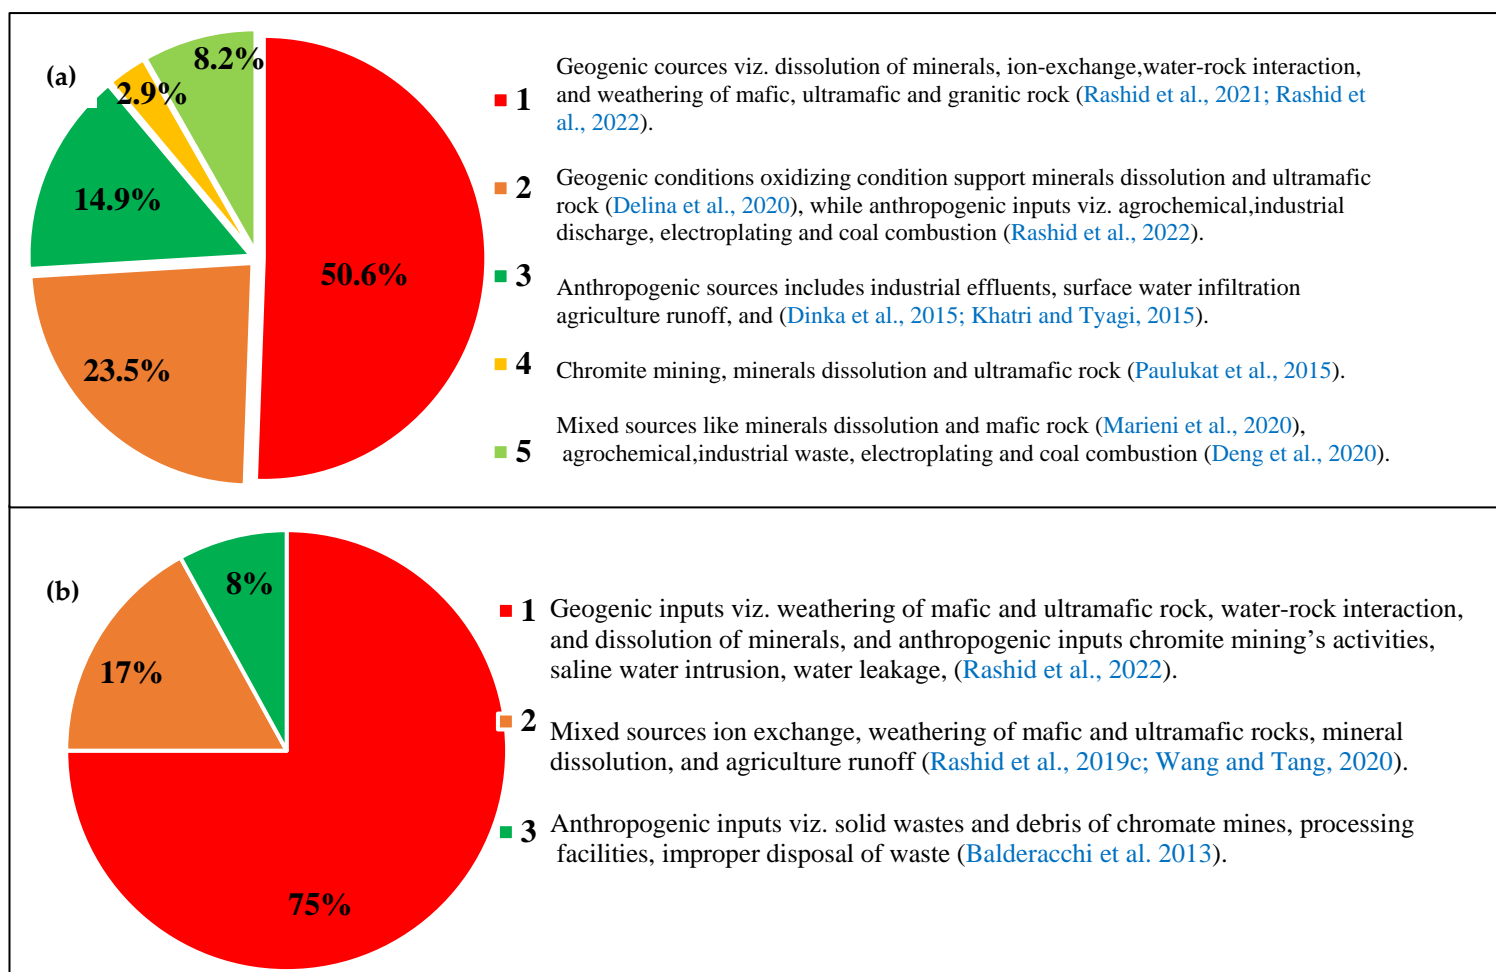

**Figure S2.** (a) Showing PCA-MLR results of groundwater sources, and (b) chromite mines water percentage contribution of pollutant sources in the groundwater of the study are
